# Supplementary material for: Iron uptake system mediates nitrate-facilitated cadmium accumulation in tomato (Solanum lycopersicum) plants
Source: PubMed Central journal article supplement — J Exp Bot. 2012 Feb 29;63(8):3127–36. doi: 10.1093/jxb/ers036 (PMC3350926; doi:10.1093/jxb/ers036), 2012-02-29
Supplement: supp_ers036_00069872-file001.pdf [file supp_ers036_00069872-file001.pdf]

**Iron uptake system mediates nitrate-facilitated cadmium accumulation in tomato (*Solanum lycopersicum*) plants**

*Bing Fang Luo, Shao Ting Du, Kai Xing Lu, Wen Jing Liu, Xian Yong Lin, and Chong Wei Jin*

**Supplementary Material**

## Supplement Materials

**Table S1.** Comparison of Cd and Fe forms between  $\text{NO}_3^-$  and  $\text{NH}_4^+$  mediums. The compositions of Cd, Fe and other nutrients in  $\text{NO}_3^-$  and  $\text{NH}_4^+$  mediums were described in “Materials and Methods”. The metal form in the medium as a percentage of total metal, was estimated by GEOCHEM-PC.

| Metal form                            | Predicted percentage of Cd form (%) |                        | Predicted percentage of Fe form (%) |                        |      |
|---------------------------------------|-------------------------------------|------------------------|-------------------------------------|------------------------|------|
|                                       | $\text{NO}_3^-$ medium              | $\text{NH}_4^+$ medium | $\text{NO}_3^-$ medium              | $\text{NH}_4^+$ medium |      |
| Free metal                            | 22.86                               | 22.62                  | 0                                   | 0                      |      |
| Complexed with EDTA                   | 70.94                               | 67.42                  | 92.42                               | 92.76                  |      |
| Soluble forms                         | Complexed with $\text{SO}_4^{2-}$   | 2.61                   | 6.50                                | 0                      | 0    |
|                                       | Complexed with $\text{Cl}^-$        | 3.18                   | 3.12                                | 0                      | 0    |
|                                       | Complexed with $\text{PO}_4^{3-}$   | 0.36                   | 0.33                                | 0.01                   | 0.01 |
|                                       | Complexed with $\text{NO}_3^-$      | 0.05                   | 0                                   | 0                      | 0    |
| In solid form with $\text{PO}_4^{3-}$ | 0                                   | 0                      | 7.56                                | 7.22                   |      |

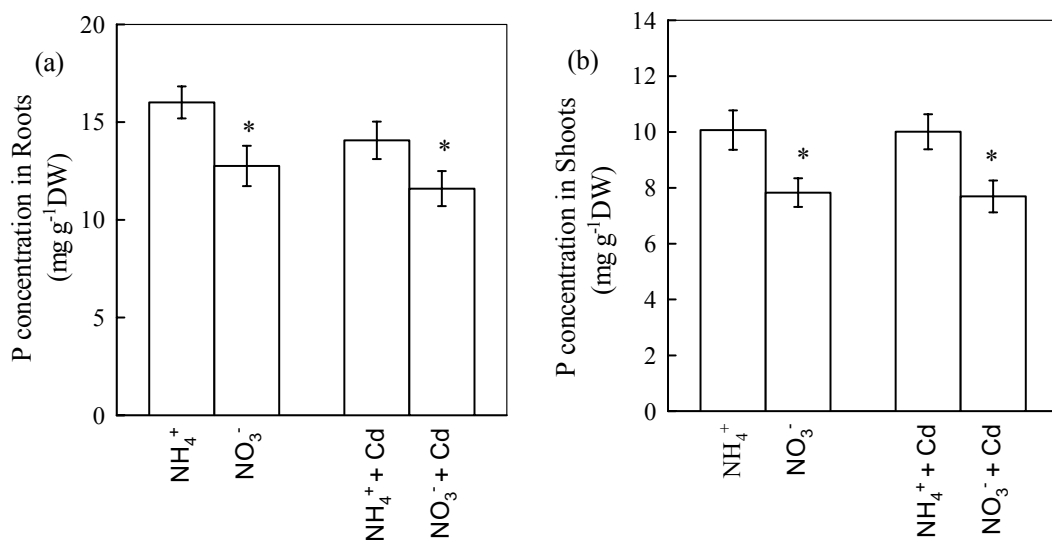

**Fig. S1.** Effects of N-form on P concentrations in tomato plants during Cd exposure. **(a)** P concentration in roots. **(b)** P concentration in shoots. The plants were pre-cultured in the growth solution contained both NO<sub>3</sub><sup>-</sup> and NH<sub>4</sub><sup>+</sup> for 12 days, and then were transferred to Cd-free or 2μM Cd-added growth solutions with either NO<sub>3</sub><sup>-</sup> or NH<sub>4</sub><sup>+</sup> as the sole nitrogen source. The pH in the all treatments was buffered at 5.5 using MES. The roots and shoots of plants after 8 d of treatments were harvested for P analysis. Data are means ± SD (n = 4). \*, Significant differences ( $P < 0.05$ ) between NO<sub>3</sub><sup>-</sup> and NH<sub>4</sub><sup>+</sup> treatments.
